# Supplementary material for: Immune Responses in Pregnant Sows Induced by Recombinant Lactobacillus johnsonii Expressing the COE Protein of Porcine Epidemic Diarrhea Virus Provide Protection for Piglets against PEDV Infection
Source: MDPI journal article supplement (doi:10.3390/v14010007), 2021-12-21
Supplement: s1 [file s1]

**Table S1.** Primer sequences of RT-qPCR.

| Gene   | Primer sequence (5'-3')                  | Product size (bp) |
|--------|------------------------------------------|-------------------|
| PEDV-N | F-GGTATTGGAGAAAATCCTGACAGGCATAAGCAACAGCA | 251               |
|        | R- GACGCATCAACACCTTTTTTCGACAAATTCCGCATC  |                   |
